# Supplementary material for: An anion exchange reaction: an effective approach to prepare alloyed Co–Fe bimetallic disulfide for improving the electrocatalytic activity
Source: Royal Society of Chemistry journal article supplement (doi:10.1039/c9cc03349a), 2019-01-01
Supplement: c9cc03349a1.pdf [file c9cc03349a1.pdf]

## Supporting information

### Anion exchange reaction: an effective approach to prepare alloyed Co-Fe bimetallic disulfide for improving electrocatalytic activity

Tongtong Li,<sup>#</sup> Shuaishuai Zhao,<sup>#</sup> Yongxin Lu, Zhijie Li, Zhida Gao,<sup>\*</sup> and Yan-Yan Song<sup>\*</sup>

*College of Sciences, Northeastern University, Shenyang 110004, China*

*E-mail addresses: [gaozd@mail.neu.edu.cn](mailto:gaozd@mail.neu.edu.cn) ; [yysong@mail.neu.edu.cn](mailto:yysong@mail.neu.edu.cn)*

## Experimental

### Reagents

Carbon cloth (CC) was purchased from CeTech Co., Ltd. Anhydrous cobalt chloride (CoCl<sub>2</sub>, ≥98.0 %) and Nafion (5.0 wt.%) were purchased from Sigma-Aldrich. Potassium ferricyanide (K<sub>3</sub>[Fe(CN)<sub>6</sub>], 99.5 wt.%) and urea (CO(NH<sub>2</sub>)<sub>2</sub>, 99 wt.%) were purchased from Sinopharm Group Chemical Reagent Co. Ltd. Pt/C (20 wt.% Pt on carbon) was purchased from Shanghai Macklin Biochemical Co., Ltd. All reagents are of analytical grade. All aqueous solutions were prepared in deionized (DI) water.

### Synthesis of Co(CO<sub>3</sub>)<sub>0.5</sub>(OH)·0.11H<sub>2</sub>O nanoneedles on CC

The CC was ultrasonicated for 10 min with acetone, ethanol, and deionized water. Then, the CC was immersed in a mixed solution of concentrated sulfuric acid and concentrated nitric acid with volume ratio of 1:3, and ultrasonicated for 2 h. Finally, the cleaned CC was washed with deionized water for several times and dried in air before use. The Co(CO<sub>3</sub>)<sub>0.5</sub>(OH)·0.11H<sub>2</sub>O nanoneedles on CC (denoted as CCHH/CC)

was synthesized by a facile hydrothermal method. Typically, the CC is placed vertically into a volumetric flask with a capacity of 88 ml, which contains an aqueous solution of 0.1 M CoCl<sub>2</sub> and 3.12 wt.% urea. Then, the container is sealed and heated at 90 °C for 8 h.

### **Synthesis of Co<sub>2</sub>Fe(CN)<sub>6</sub>·2H<sub>2</sub>O nanocrystal on CCHH/CC**

The Co<sub>2</sub>Fe(CN)<sub>6</sub>·2H<sub>2</sub>O was prepared with a slight modification of the method reported previously.<sup>1</sup> The Co<sub>2</sub>Fe(CN)<sub>6</sub>·2H<sub>2</sub>O nanocrystals (denoted as CFNH) was prepared via a simple anion exchange reaction. The as-formed CCHH/CC was immersed into a 0.1 M K<sub>3</sub>[Fe(CN)<sub>6</sub>] aqueous solution for anion exchange at 60 °C for 2 h. The resulted CFNH/CCHH/CC was collected washed with distilled water and then dried at 60 °C overnight in air.

### **Synthesis of FeS<sub>2</sub>/CoS<sub>2</sub>/CC**

A tube furnace manufactured by Thermo Corporation of the United States (TF-55035KC-1) was used as an annealing apparatus for all the samples. The FeS<sub>2</sub>/CoS<sub>2</sub>/CC composite were obtained through annealing CFNH/CCHH/CC in a hydrogen sulfide atmosphere (10% H<sub>2</sub>S, 90% Ar) at 450 °C for 10 min. The same synthesis step was used for the preparation of CoS<sub>2</sub>/CC composite, but the precursor was replaced with CCHH/CC.

### **Characterizations**

Surface morphology of samples was characterized using scanning electron microscopy (SEM Hitachi S4800, Japan) and transmission electron microscopy (TEM, JEOL 2000). Powder X-ray diffraction (XRD) patterns were collected using an X'Pert

Pro MPD diffractometer (PANalytical) with Cu K $\alpha$  radiation. X-ray photoelectron spectroscopy (XPS) was performed on a Perkin-Elmer Physical Electronics 5600 spectrometer using Al K $\alpha$  radiation at 13 kV, and using the binding energy of C 1s at 284.6 eV as a reference.

### **Electrochemical measurements**

The CHI660E electrochemical workstation (CH Instrument Co. Shanghai) was used for all electrochemical tests. Linear sweep voltammetry (LSV) was carried out with a typical three-electrode system in N<sub>2</sub>-saturated 0.5 M H<sub>2</sub>SO<sub>4</sub> at a scan rate of 5 mV s<sup>-1</sup> at room temperature. The Pt foil and saturated calomel electrodes (SCE) were used as counter and reference electrodes, respectively. Electrochemically inert polyimide tape was employed to define 2 x 1 cm x 1 cm area of the working electrode, which was immersed in the solution. The potential measured against SCE was converted to the potential versus the RHE by adding a value of (0.242 + 0.059 pH) V. All linear sweep voltammetry tests were performed with 90% iR compensation. Electrochemical impedance spectroscopy (EIS) was performed at -0.2 V, and applying a scanning frequency from 100 kHz to 10 Hz.

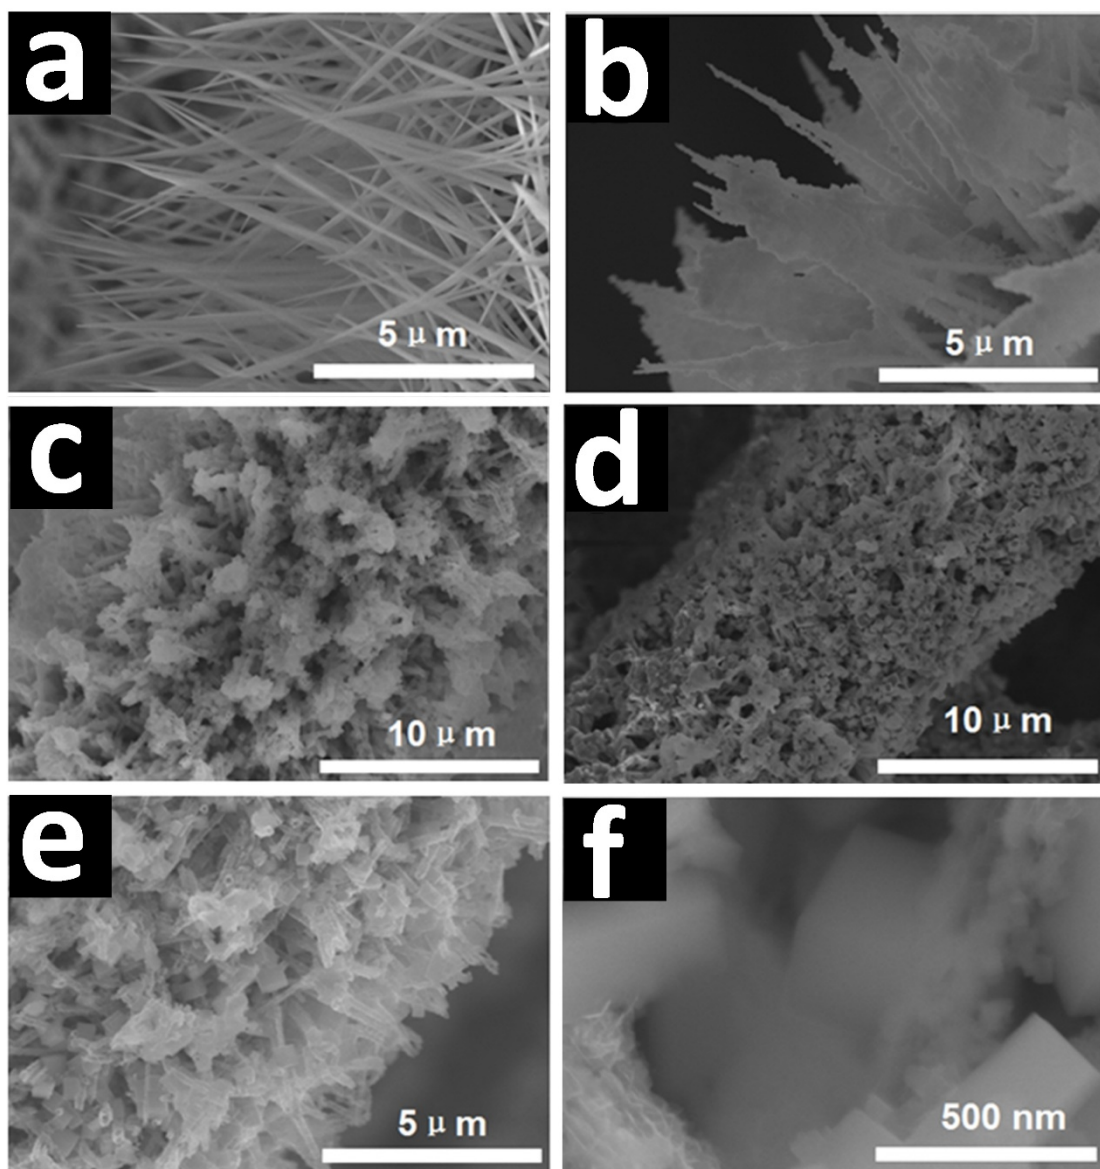

**Fig. S1** SEM images of FeS<sub>2</sub>/CoS<sub>2</sub>/CC prepared by different anion exchange time of 0 h (a), 0.5 h (b), 1 h (c), 1.5 (d) and 2 h (e, f).

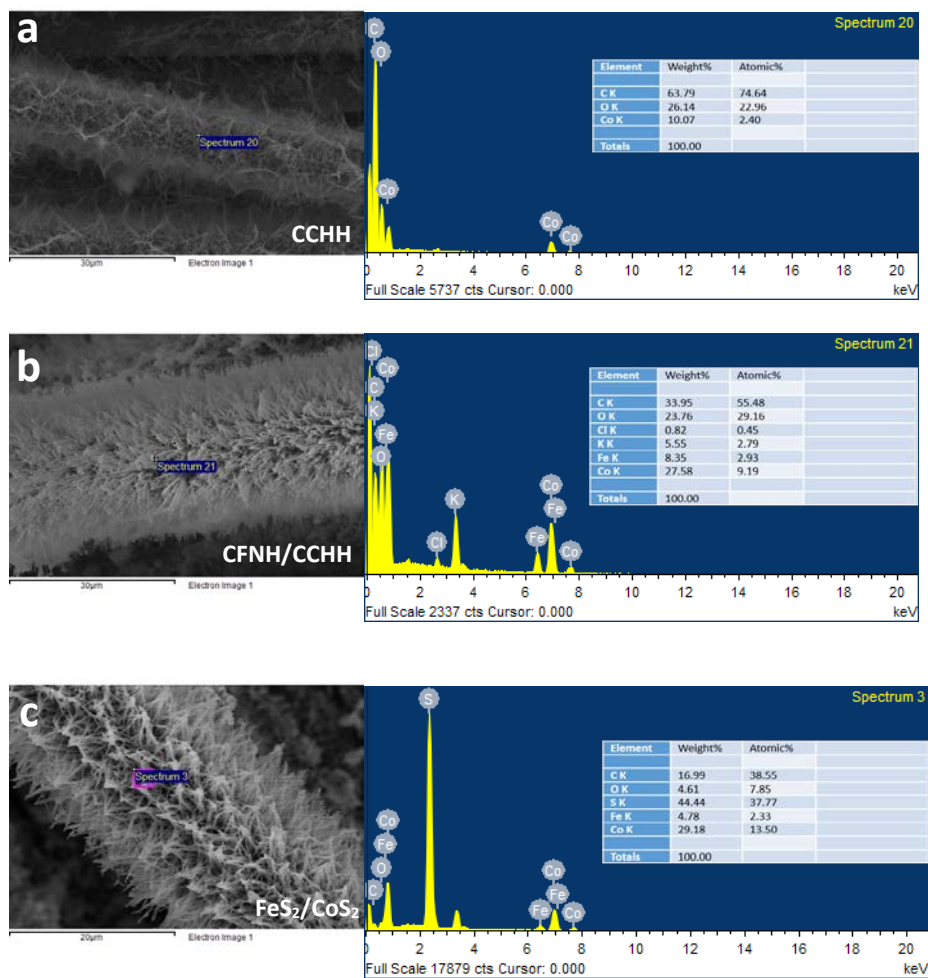

**Fig. S2** SEM images and corresponding EDX results of the products in different steps. (a)  $\text{Co}(\text{CO}_3)_{0.5}(\text{OH}) \cdot 0.11\text{H}_2\text{O}/\text{CC}$  (CCHH) obtained by hydrothermal treatment, (b) CCHH after ion exchange for 2 h in 0.1 M  $\text{K}_3[\text{Fe}(\text{CN})_6]$  solution, and (c) the resultant  $\text{FeS}_2/\text{CoS}_2/\text{CC}$ .

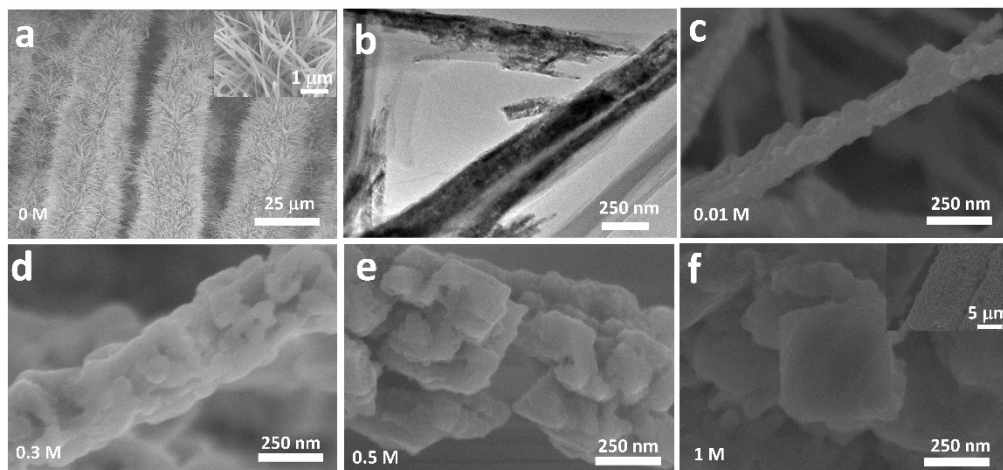

**Fig.S3** The morphology of the samples treated with different concentration of  $\text{K}_3[\text{Fe}(\text{CN})_6]$ . (a) SEM and (b) TEM images of the sample without  $\text{K}_3[\text{Fe}(\text{CN})_6]$  treatment ( $\text{CoS}_2/\text{CC}$ ). Inset in (a) is the enlarged SEM image. SEM images of the samples treated with (c) 0.01 M, (d) 0.3 M, (e) 0.5 M and (f) 1 M  $\text{K}_3[\text{Fe}(\text{CN})_6]$ , respectively. Inset in (f) is the SEM image in less magnification.

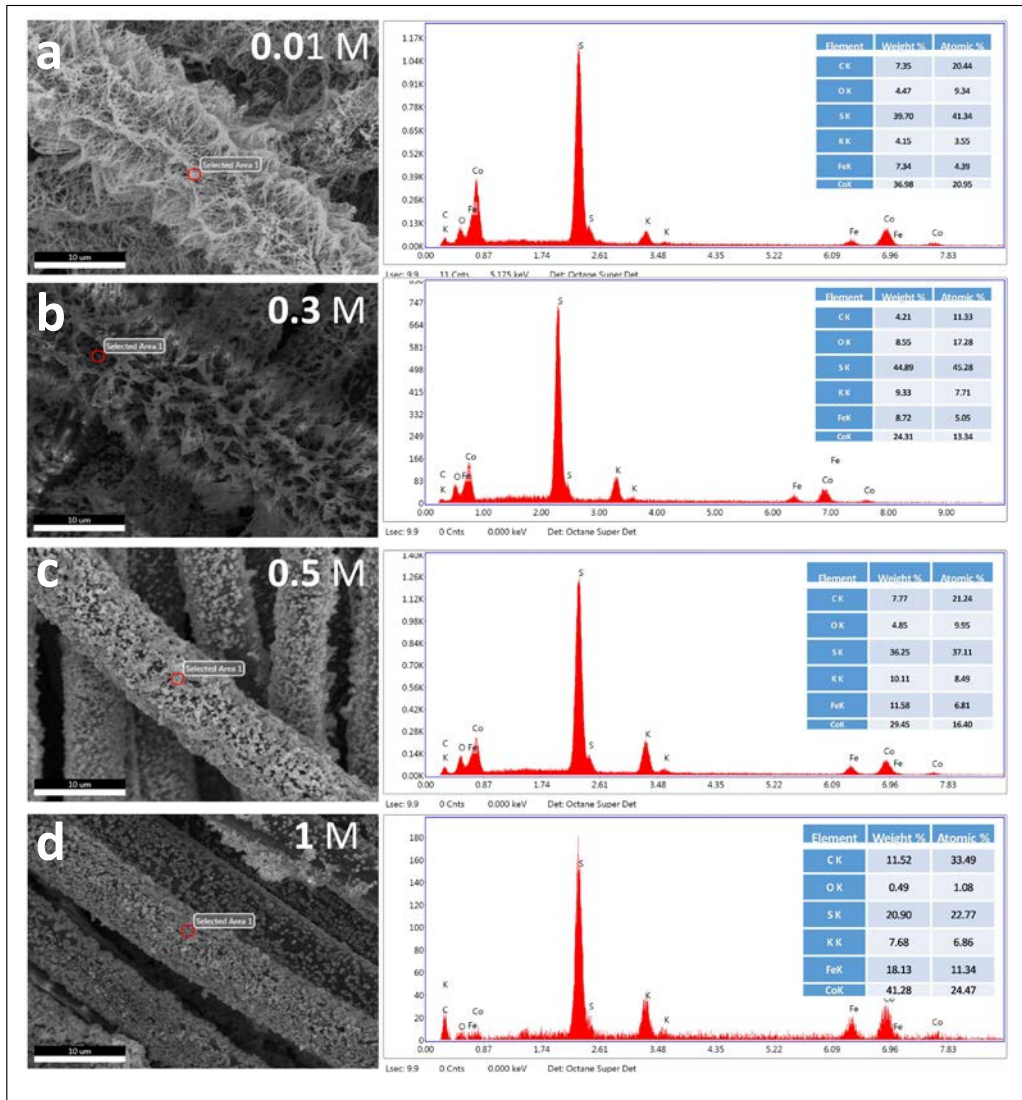

**Fig.S4** SEM images and corresponding EDX results of the samples treated with different concentration of  $K_3[Fe(CN)_6]$ . (a) 0.01 M, (b) 0.3 M, (c) 0.5 M and (d) 1 M  $K_3[Fe(CN)_6]$ , respectively.

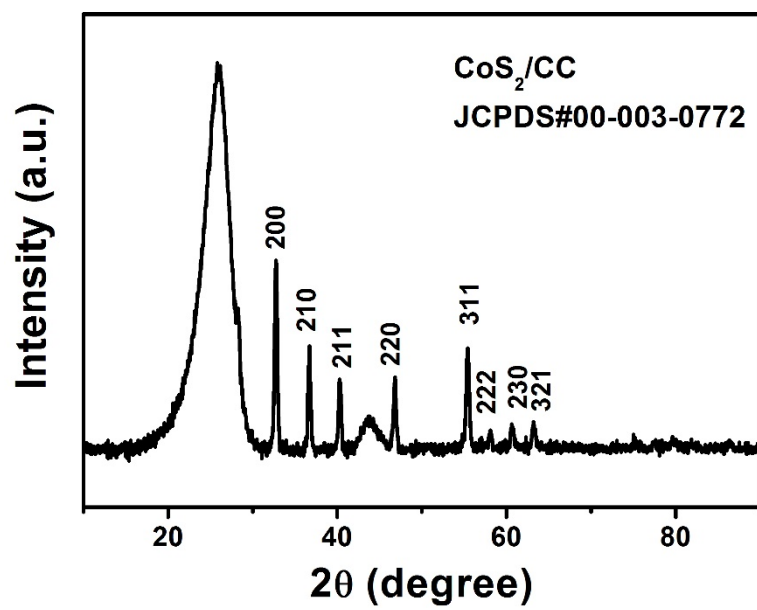

Fig. S5 XRD pattern of CoS<sub>2</sub>/CC.



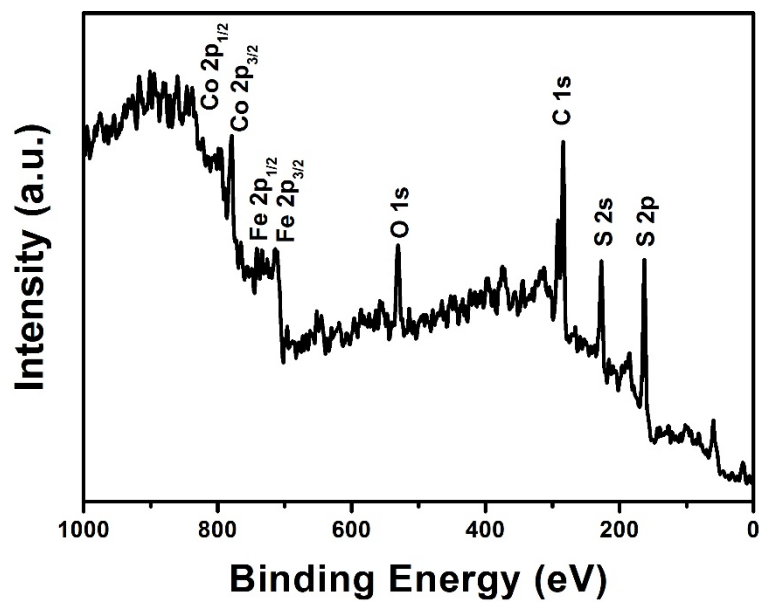

**Fig. S6** XPS survey spectrum of FeS<sub>2</sub>/CoS<sub>2</sub>/CC.

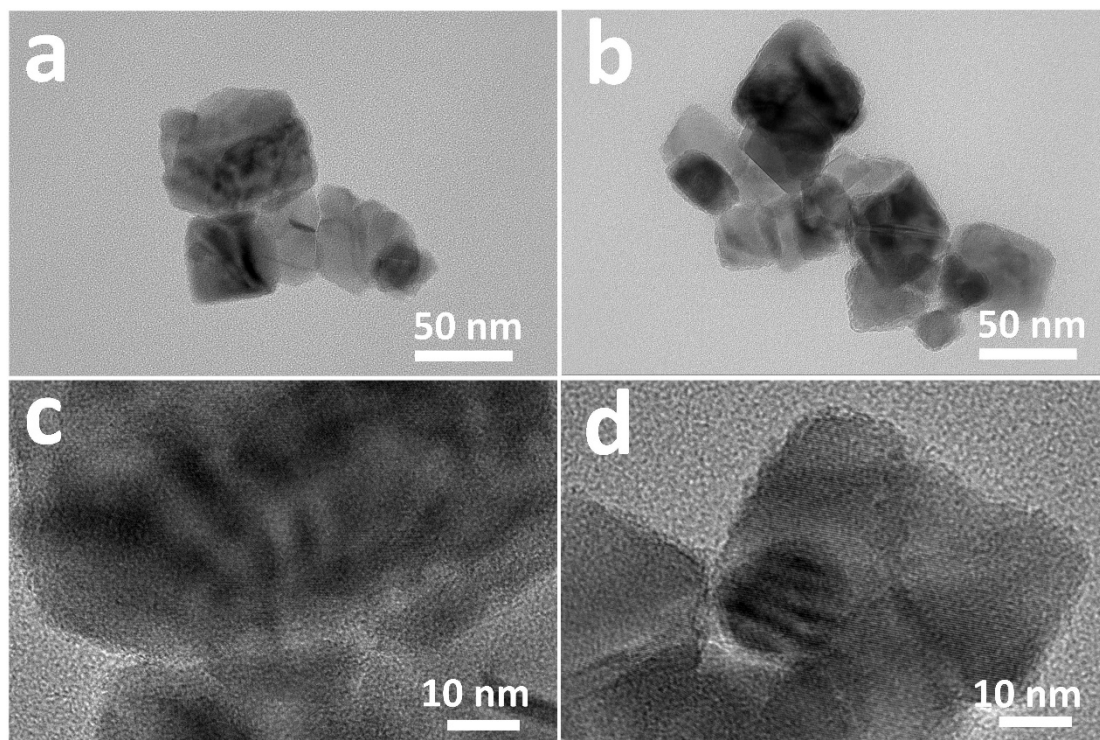

**Fig. S7** Additional TEM and HR-TEM image of FeS<sub>2</sub>/CoS<sub>2</sub>/CC.

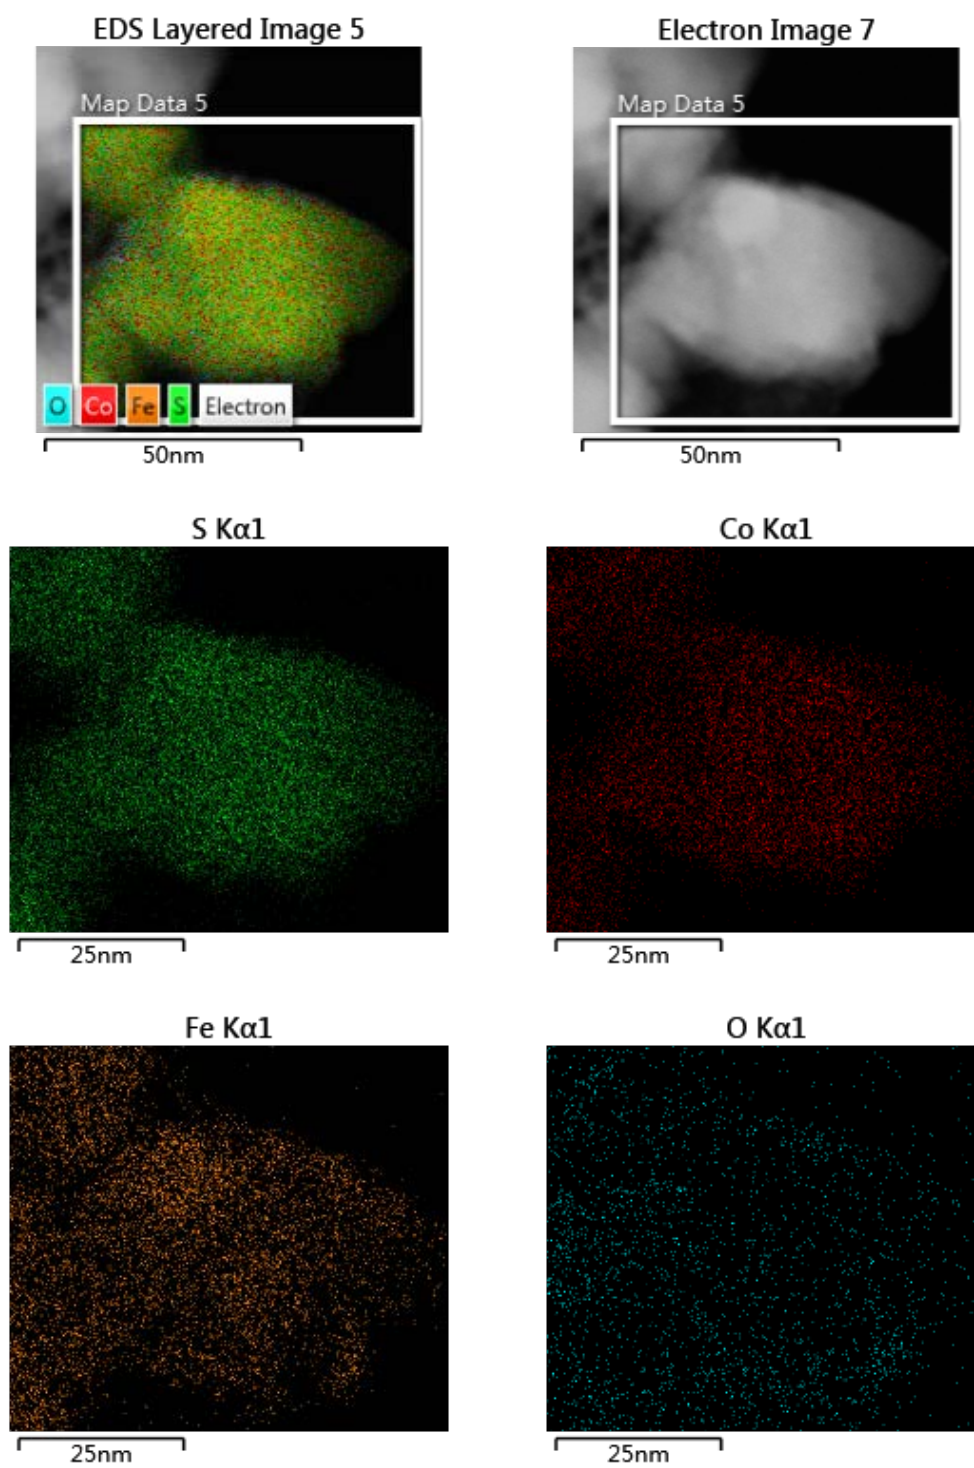

**Fig. S8** Additional STEM image and corresponding EDX mapping of Co, Fe, S, and O elements in FeS<sub>2</sub>/CoS<sub>2</sub> nanocrystals..

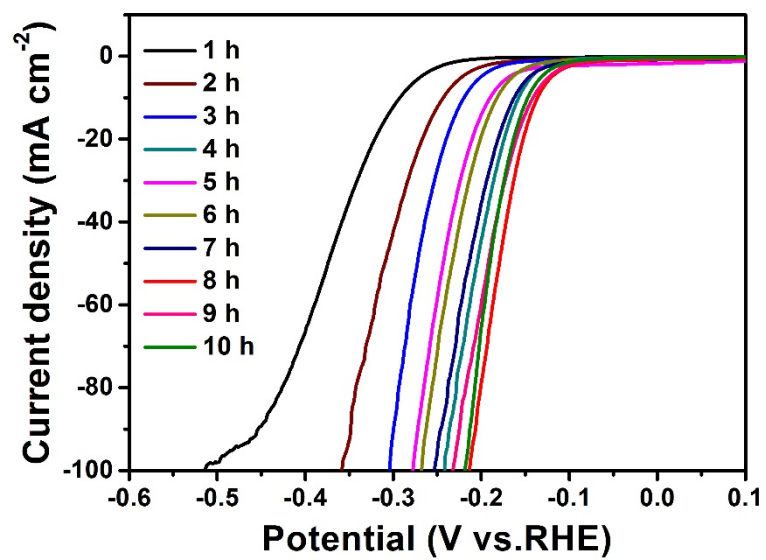

**Fig. S9** Polarization curves of FeS<sub>2</sub>/CoS<sub>2</sub>/CC prepared with different hydrothermal time in the first step.

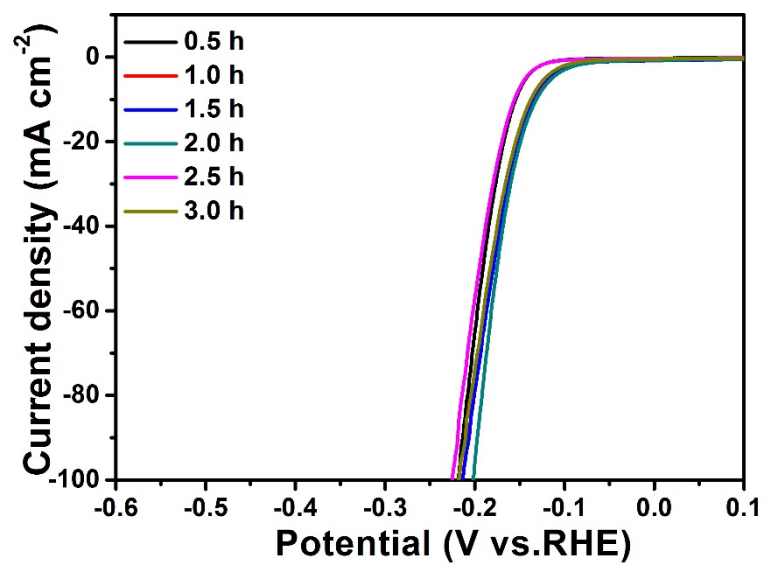

**Fig. S10** Polarization curves of FeS<sub>2</sub>/CoS<sub>2</sub>/CC prepared with different anion exchange time in second-step.

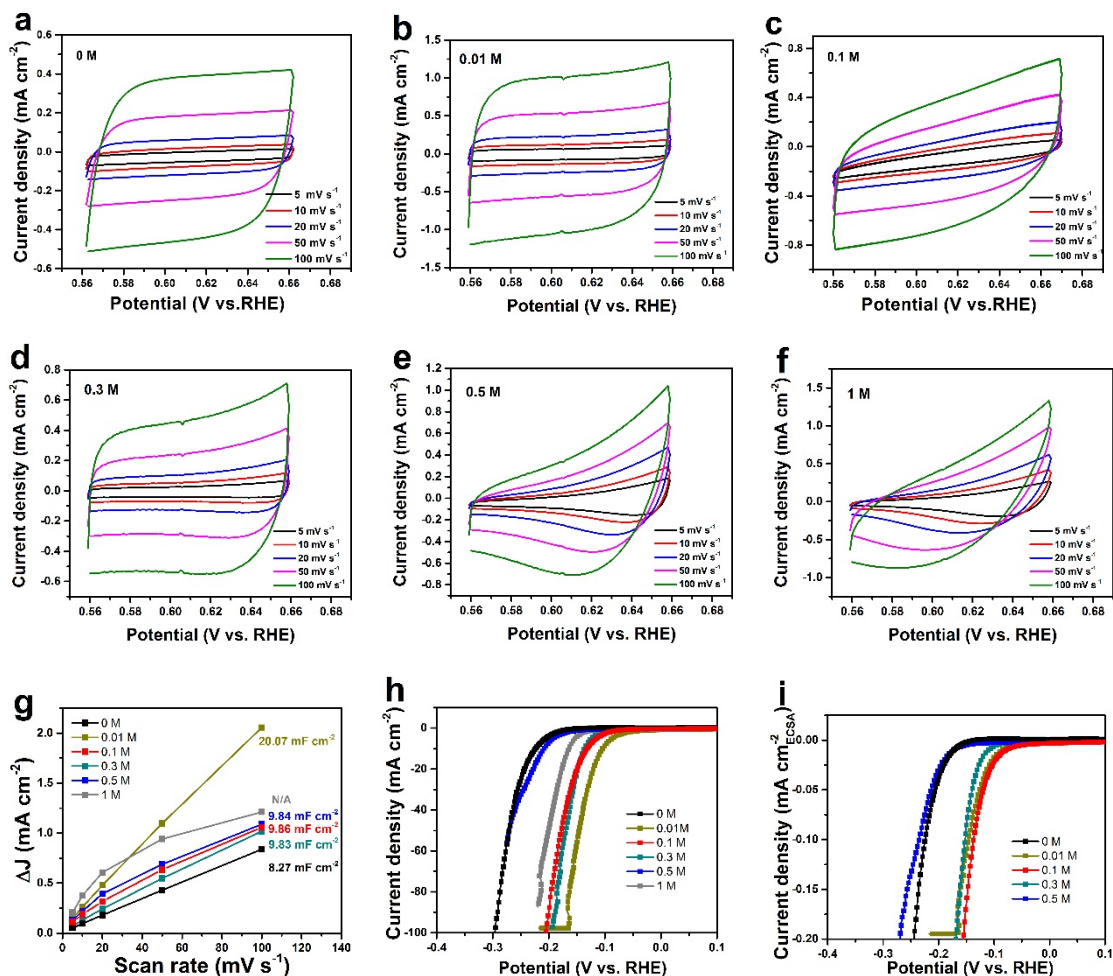

**Fig.S11** Cyclic voltammograms (CVs) of samples treated with (a) 0 M, (b) 0.01 M, (c) 0.1 M, (d) 0.3 M, (e) 0.5 M and (f) 1 M  $K_3[Fe(CN)_6]$ , respectively. (g) The calculated values of the double layer capacitance ( $C_{dl}$ ). HER polarization curves of the samples in  $N_2$ -saturated 0.5 M  $H_2SO_4$  normalized by geometric area (h) and ECSA (i), respectively.

The specific capacitance can be converted into an ECSA using the specific capacitance value for a flat standard with 1  $cm^2$  of real surface area. The specific capacitance for a flat surface is generally found to be in the range of 20-60  $\mu F cm^{-2}$ . 40  $\mu F cm^{-2}$  is assumed for a flat surface in the following calculations of TOF.

$$\text{Area}_{ECSA}^{\text{FeS}_2/\text{CoS}_2/\text{CC}} = \frac{9.86 \text{ mFcm}^{-2}}{40 \text{ } \mu\text{Fcm}^{-2} \text{ per cm}_{ECSA}^2} = 246.5 \text{ cm}_{ECSA}^2$$

$$\text{Area}_{ECSA}^{\text{CoS}_2/\text{CC}} = \frac{8.27 \text{ mFcm}^{-2}}{40 \text{ } \mu\text{Fcm}^{-2} \text{ per cm}_{ECSA}^2} = 206.8 \text{ cm}_{ECSA}^2$$

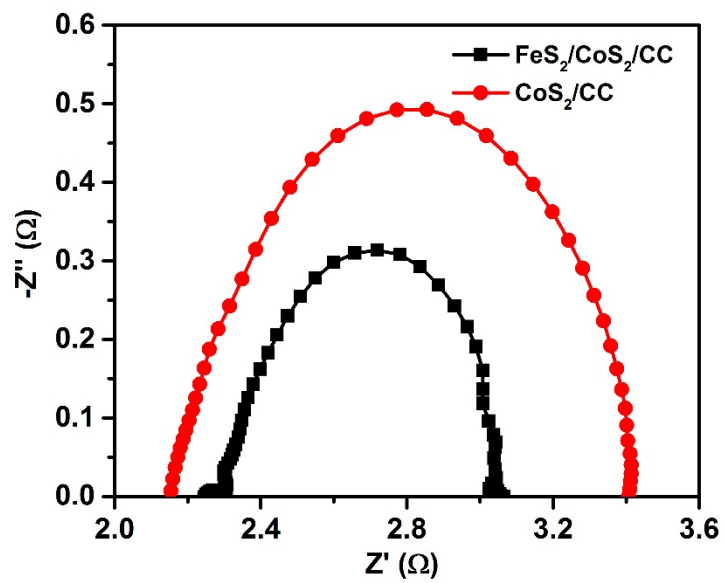

**Fig. S12** Nyquist plots of (a)  $\text{CoS}_2/\text{CC}$  and (b)  $\text{FeS}_2/\text{CoS}_2/\text{CC}$  at  $-200$  mV (vs. RHE).



**Table.S1** The atomic concentration of the elements in the FeS<sub>2</sub>/CoS<sub>2</sub>/CC.

| -----<br>Atomic Concentration of FeS <sub>2</sub> /CoS <sub>2</sub> /CC by XPS<br>----- |       |       |      |      |
|-----------------------------------------------------------------------------------------|-------|-------|------|------|
| C1s                                                                                     | O1s   | S2p   | Fe2p | Co2p |
| 55.76                                                                                   | 13.26 | 23.34 | 3.95 | 3.69 |

**Table.S2** The lattice spacing parameters of the cubic pyrite phase crystal.

| Spot# | d-Spacing (nm) | Rec. Pos. (1/nm) | Degrees to Spot 1 | Facet |
|-------|----------------|------------------|-------------------|-------|
| 1     | 0.2778         | 3.6              | 0                 | (200) |
| 2     | 0.1964         | 5.093            | 36.75             | (220) |
| 3     | 0.3154         | 3.171            | 80.26             | (111) |
| 4     | 0.2268         | 4.409            | 135.1             | (211) |

**Table.S3** Comparison of HER performance of FeS<sub>2</sub>/CoS<sub>2</sub>/CC in acid media with recently well-developed HER electrocatalysts.

| Catalyst                                               | Mass loading (mg cm <sup>-2</sup> ) | C <sub>dl</sub> (mF cm <sup>-2</sup> ) | Tafel slope (mV decade <sup>-1</sup> ) | Current Density (j, mA cm <sup>-2</sup> ) | Overpotential at the corresponding j (η mV) | Reference |
|--------------------------------------------------------|-------------------------------------|----------------------------------------|----------------------------------------|-------------------------------------------|---------------------------------------------|-----------|
| CoS <sub>2</sub> -MoS <sub>2</sub> /CN Ts              | ~0.35                               | /                                      | 67                                     | 80                                        | 240                                         | [2]       |
| NiP-MoS <sub>2</sub>                                   | /                                   | /                                      | 76                                     | 40                                        | 250                                         | [3]       |
| Zn-Co-S/TM                                             | 1.0                                 | 28.58                                  | 164                                    | 20                                        | 238                                         | [4]       |
| CoS <sub>2</sub> /GO-5%                                | /                                   | /                                      | 285                                    | 100                                       | 350                                         | [5]       |
| MoS <sub>2</sub> /CoS <sub>2</sub> /CC                 | 18.6                                | 7.04                                   | 73.4                                   | 100                                       | 240                                         | [6]       |
| CoS <sub>2</sub> Pyramid/Ti                            | /                                   | 3.42±0.09                              | ~72                                    | ~65                                       | ~260                                        | [7]       |
| Ag <sub>2</sub> S/CuS                                  | 12.06                               | /                                      | 75                                     | 10                                        | 200                                         | [8]       |
| NiCu-P                                                 | 65                                  | /                                      | 37                                     | 10                                        | 226                                         | [9]       |
| (Fe <sub>0.48</sub> Co <sub>0.52</sub> )S <sub>2</sub> | /                                   | 3.74                                   | 47.5                                   | 10                                        | 196                                         | [10]      |
| FeCo@N-graphene                                        | 0.285                               | /                                      | 74                                     | 10                                        | 262                                         | [11]      |
| MoS <sub>2</sub> -WS <sub>2</sub> Heterostructures     | /                                   | /                                      | 72                                     | 10                                        | 129                                         | [12]      |
| Ti <sub>3</sub> C <sub>2</sub> NFs                     | 0.3                                 | 21                                     | 97                                     | 10                                        | 169                                         | [13]      |
| M-MoS <sub>2</sub> nanopetals                          | 0.1                                 | 10.05                                  | 44                                     | 10                                        | 210                                         | [14]      |
| MoP/CNT                                                | 1                                   | 54                                     | 51.6                                   | 10                                        | 114                                         | [15]      |
|                                                        |                                     |                                        |                                        | 50                                        | ~200                                        |           |
| FeS <sub>2</sub> /CoS <sub>2</sub> /CC                 | 0.91                                | 9.86                                   | 57                                     | 100                                       | 205                                         | This work |

## Supplement References

1. H. T. Bui, D. Y. Ahn, N. K. Shrestha, M. M. Sung, J. K. Lee and S.-H. Han, *J. Mater. Chem. A*, 2016, **4**, 9781-9788.
2. Y.-R. Liu, W.-H. Hu, X. Li, B. Dong, X. Shang, G.-Q. Han, Y.-M. Chai, Y.-Q. Liu and C.-G. Liu, *Appl. Surf. Sci.*, 2016, **384**, 51-57.
3. Y.-R. Liu, W.-H. Hu, X. Li, B. Dong, X. Shang, G.-Q. Han, Y.-M. Chai, Y.-Q. Liu and C.-G. Liu, *Appl. Surf. Sci.*, 2016, **383**, 276-282.
4. Y. Liang, Q. Liu, Y. Luo, X. Sun, Y. He and A. M. Asiri, *Electrochim. Acta*, 2016, **190**, 360-364.
5. W. Xing, Y. Zhang, Q. Xue and Z. Yan, *Nanoscale Res. Lett.*, 2015, **10**, 488.
6. J. Huang, D. Hou, Y. Zhou, W. Zhou, G. Li, Z. Tang, L. Li and S. Chen, *J. Mater. Chem. A*, 2015, **3**, 22886-22891.
7. H. Zhang, Y. Li, G. Zhang, P. Wan, T. Xu, X. Wu and X. Sun, *Electrochim. Acta*, 2014, **148**, 170-174.
8. H. Ren, W. Xu, S. Zhu, Z. Cui, X. Yang and A. Inoue, *Electrochim. Acta*, 2016, **190**, 221-228.
9. M. Asnavandi, B. H. R. Suryanto, W. Yang, X. Bo and C. Zhao, *ACS Sustainable Chem. Eng.*, 2018, **6**, 2866-2871.
10. M. S. Faber, M. A. Lukowski, Q. Ding, N. S. Kaiser and S. Jin, *J. Phys. Chem. C*, 2014, **118**, 21347-21356.
11. Y. Yang, Z. Lun, G. Xia, F. Zheng, M. He and Q. Chen, *Energy Environ. Sci.*, 2015, **8**, 3563-3571.
12. D. Vikraman, S. Hussain, K. Akbar, L. Truong, A. Kathalingam, S.-H. Chun, J. Jung, H. J. Park and H.-S. Kim, *ACS Sustainable Chem. Eng.*, 2018, **6**, 8400-8409.
13. W. Yuan, L. Cheng, Y. An, H. Wu, N. Yao, X. Fan and X. Guo, *ACS Sustainable Chem. Eng.*, 2018,

**6**, 8976-8982.

14. J. Wang, N. Wang, Y. Guo, J. Yang, J. Wang, F. Wang, J. Sun, H. Xu, Z.-H. Liu and R. Jiang *ACS Sustainable Chem. Eng.*, 2018, **6**, 13435-13442.

15. A. Adam, M. H. Suliman, H. Dafalla, A. R. Al-Arfaj, M. N. Siddiqui and M. Qamar, *ACS Sustainable Chem. Eng.*, 2018, **6**, 11414-11423.
